# Supplementary material for: NIR-Mediated Deformation from a CNT-Based Bilayer Hydrogel
Source: MDPI journal article supplement (doi:10.3390/polym16081152), 2024-04-19
Supplement: s1 [file s1]

**Supporting Information for**  
**NIR-mediated Deformation from a CNT-based Bilayer Hydrogel**

Shijun Long<sup>1,2,3\*</sup>, Chang Liu<sup>1</sup>, Han Ren<sup>1</sup>, Yali Hu<sup>1</sup>, Chao Chen<sup>4\*</sup>, Yiwang Huang<sup>1,2</sup> and

Xuefeng Li<sup>1,2,3\*</sup>

<sup>1</sup> *Hubei Provincial Key Laboratory of Green Materials for Light Industry, Hubei*

*University of Technology, Wuhan, 430068, PR China*

<sup>2</sup> *Hubei Longzhong Laboratory, Xiangyang, 441000, PR China*

<sup>3</sup> *New Materials and Green Manufacturing Talent Introduction and Innovation*

*Demonstration Base, Hubei University of Technology, Wuhan, 430068, PR China*

<sup>4</sup> *Hubei Key Laboratory of Polymer Materials, Hubei University, 430062, Wuhan, PR China*

\*Corresponding author: longshijun.hp@163.com; chenchao@hubu.edu.cn;  
li\_xf@mail.hbut.edu.cn

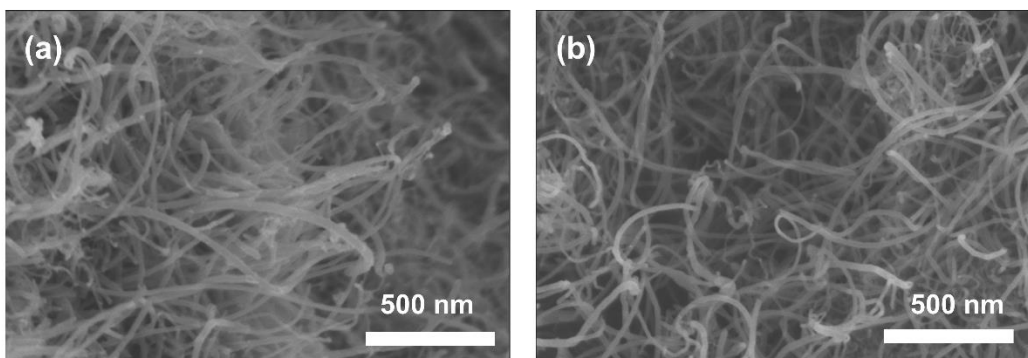

**Figure S1.** SEM photographs of original (a) and modified (b) CNTs. The scale bar is 500 nm

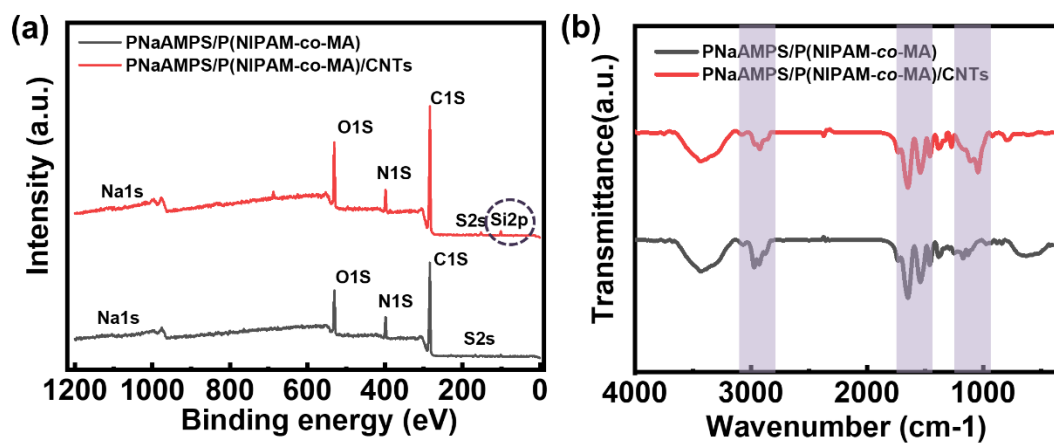

**Figure S2.** The microstructure characterization of dried PNaAMPS/P(NIPAM-co-MA) and PNaAMPS/P(NIPAM-co-MA)/CNTs hydrogel (CNTs content, 0.2 wt%). (a) XPS spectroscopy, (b) FTIR spectroscopy

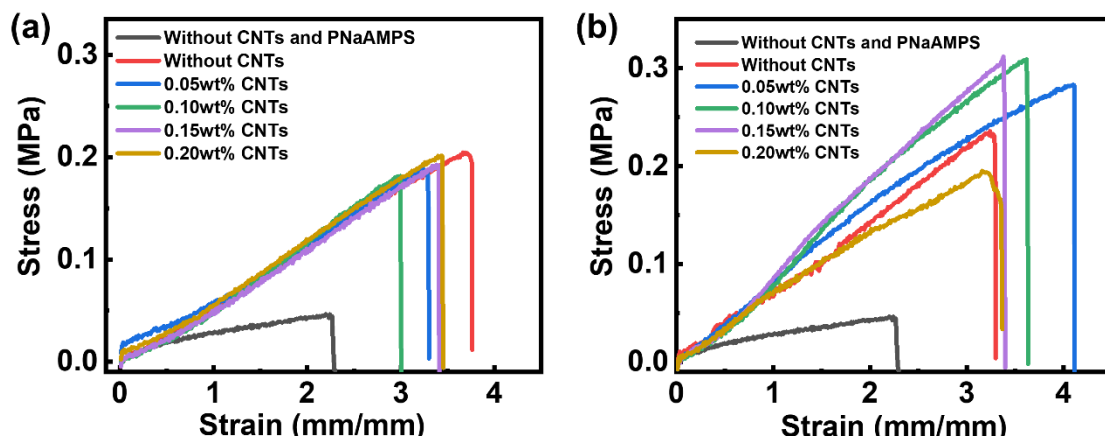

**Figure S3.** Tensile Stress-Strain curves of hydrogels(P(NIPAM-co-MA) hydrogel, PNaAMPS/P(NIPAM-co-MA) hydrogel and PNaAMPS/P(NIPAM-co-MA)/CNTs hydrogels ) (a) hydrogels added with original CNTs (b) hydrogels added with modified CNTs

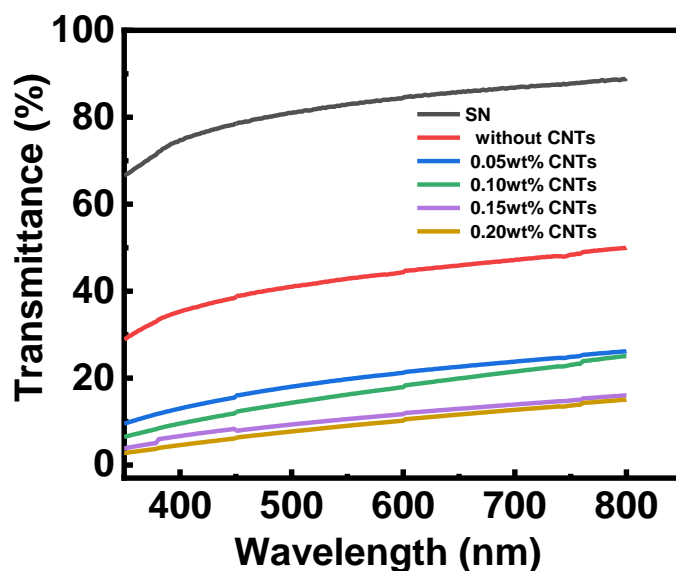

**Figure S4.** Transmittance curve of all hydrogels(PNaAMPS/P(NIPAM-co-MA), PNaAMPS/P(NIPAM-co-MA)/CNTs and SN: P(NIPAM-co-MA))

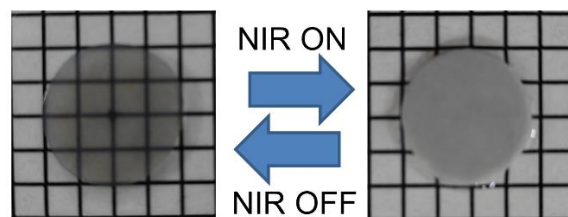

**Figure S5.** Optical photos of the phase transition behavior of PNaAMPS/P(NIPAM-co-MA)/CNTs hydrogels(CNTs content: 0.20 wt%) under near-infrared light irradiation

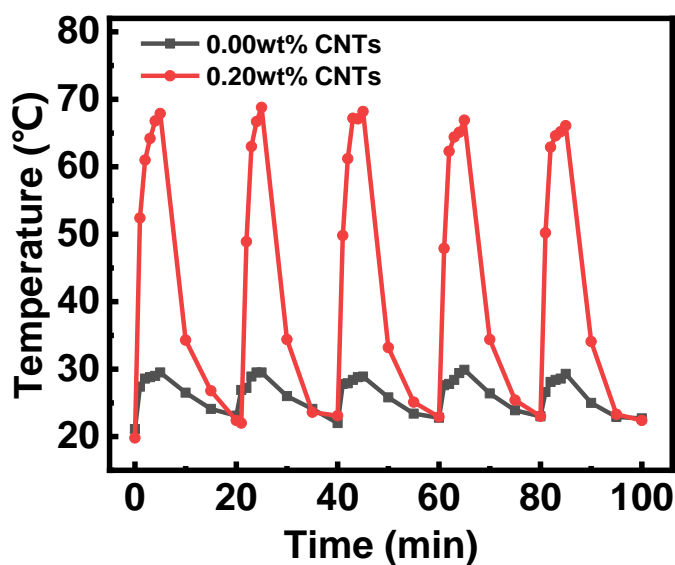

**Figure S6.** Cyclic reversible photothermal conversion behavior of PNaAMPS/P(NIPAM-co-MA)/CNTs hydrogels(Control group: PNaAMPS/P(NIPAM-co-MA) hydrogel)

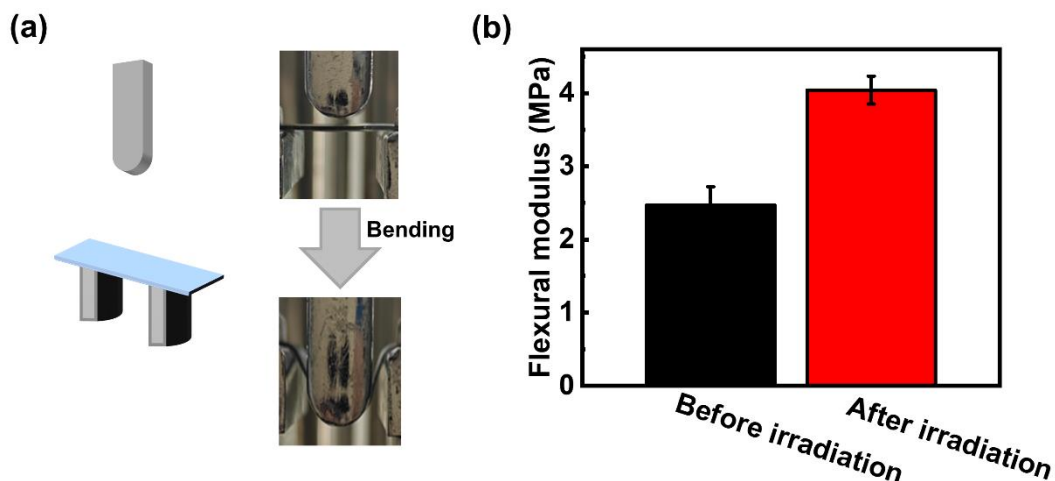

**Figure S7.** Three-point bending test of PNaAMPS/P(NIPAM-co-MA)/CNTs hydrogels (CNTs content, 0.2 wt%) before and after NIR irradiation. (a) Schematic diagram and optical images for three-point bending test; (b) Flexural modulus

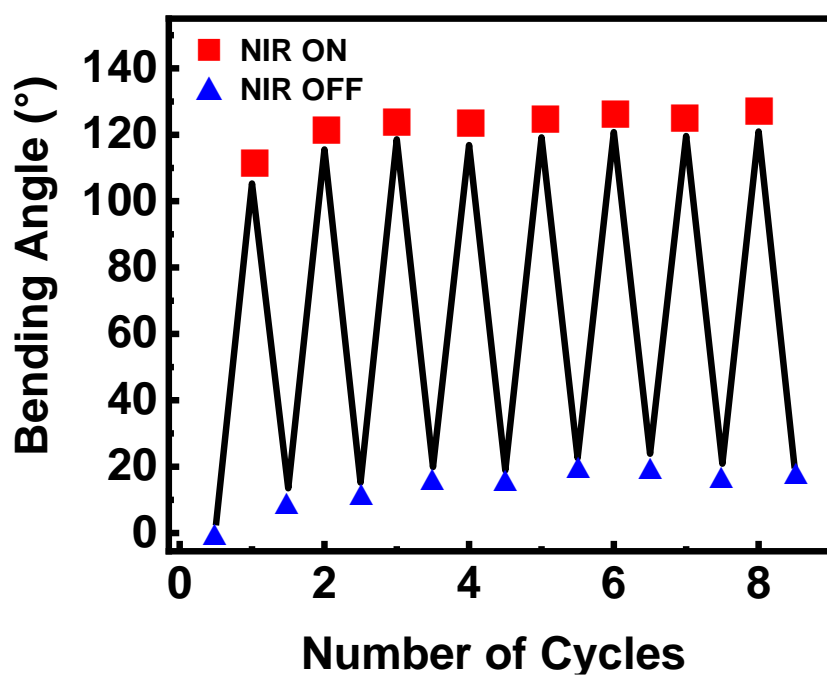

**Figure S8.** Cyclic reversible bending behavior of bilayer hydrogel(active layer: PNaAMPS/P(NIPAM-co-MA)/CNTs, negative layer: PNaAMPS/P(NIPAM-co-MA)) under infrared light irradiation

**Table S1** The elements ratio of original and modified CNTs.

| Elements        | C      | O     | Si    |
|-----------------|--------|-------|-------|
| Ratio(Original) | 92.69% | 7.21% | 0.00% |
| Ratio(Modified) | 86.24% | 9.32% | 4.44% |

**Table S2** Overall performance comparison of PNIPAM-based hydrogel actuators

| Material                                     | Structure  | Stimuli-response type | Mechanic property | Deformation |
|----------------------------------------------|------------|-----------------------|-------------------|-------------|
| This work                                    | Bilayer    | Temperature/light     | Strengthen        | 3D          |
| PNIPAM, Gelatin, PTCA, PAM <sup>[1]</sup>    | Bilayer    | Temperature/pH        | No strengthen     | 3D          |
| PNIPAM, PEDOT: PSS, Mxene <sup>[2]</sup>     | Bilayer    | Mechanic/light        | No strengthen     | 3D          |
| PNIPAM, rGO, ATPE, PLMA, 6APA <sup>[3]</sup> | Gradient   | Temperature/light     | No strengthen     | 3D          |
| PNIPAM, Spiropyran <sup>[4]</sup>            | Bilayer    | Light                 | No strengthen     | 3D          |
| PNIPAM, HEA, XLG <sup>[5]</sup>              | Gradient   | Temperature           | No strengthen     | 2D          |
| PNIPAM, Silicon Rubber <sup>[6]</sup>        | Multilayer | Temperature           | Strengthen        | 3D          |
| PNIPAM, PAM, Nanothylakoid <sup>[7]</sup>    | Bilayer    | Temperature/light     | No strengthen     | 3D          |

## Reference of Table S2

- [1] Wu, B. Y.; Le, X. X.; Jian, Y. K.; Lu, W.; Yang, Z. Y.; Zheng, Z. K.; Théato, P.; Zhang, J. W.; Zhang, A.; Chen, T. PH and Thermo Dual-Responsive Fluorescent Hydrogel Actuator. *Macromolecular Rapid Communications* **2018**, *40* (4), 1800648.
- [2] Xue, P.; Valenzuela, C.; Ma, S. S.; Zhang, X.; Ma, J. Z.; Chen, Y. H.; Xu, X. H.; Wang, L. Highly Conductive MXene/PEDOT:PSS-Integrated Poly(N-Isopropylacrylamide) Hydrogels for Bioinspired Somatosensory Soft Actuators. *Advanced Functional Materials* **2023**, *33* (24), 2214867.
- [3] Shang, H.; Le, X. X.; Si, M. Q.; Wu, S. S.; Peng, Y.; Shan, F. Q.; Wu, S.; Chen, T. Biomimetic Organohydrogel Actuator with High Response Speed and Synergistic Fluorescent Variation. *Chemical Engineering Journal* **2022**, *429*, 132290.
- [4 ] Li, C.; Xue, Y. G.; Han, M. D.; Palmer, L. C.; Rogers, J. A.; Huang, Y. G.; Stupp, S. I. Synergistic Photoactuation of Bilayered Spiropyran Hydrogels for Predictable Origami-like Shape Change. *Matter* **2021**, *4* (4), 1377–1390.
- [5] Tan, Y.; Wang, D.; Xu, H. X.; Yang, Y.; Wang, X. L.; Tian, F.; Xu, P. P.; An, W. L.; Zhao, X.; Xu, S. M. Rapid Recovery Hydrogel Actuators in Air with Bionic Large-Ranged Gradient Structure. *ACS Applied Materials & Interfaces* **2018**, *10* (46), 40125–40131.
- [6] Visentin, F.; Murali, P.; Meder, F.; Mazzolai, B. Selective Stiffening in Soft Actuators by Triggered Phase Transition of Hydrogel-Filled Elastomers. *Advanced Functional Materials* **2021**, *31* (32), 2101121
- [7] Zhao, H.; Huang, Y. M.; Lv, F. T.; Liu, L. B.; Gu, Q.; Wang, S. Biomimetic 4D-Printed Breathing Hydrogel Actuators by Nanothylakoid and Thermoresponsive Polymer Networks. *Advanced Functional Materials* **2021**, *31* (49), 2105544.
